# Supplementary material for: Stromal KITL/SCF promotes pancreas tissue homeostasis and restrains tumor progression
Source: PubMed Central journal article supplement — bioRxiv. 2024 Jul 30:2024.07.29.605485. Preprint. [Version 1] doi: 10.1101/2024.07.29.605485 (PMC11312444; doi:10.1101/2024.07.29.605485), 2024-07-30

### Supplementary Figure 1

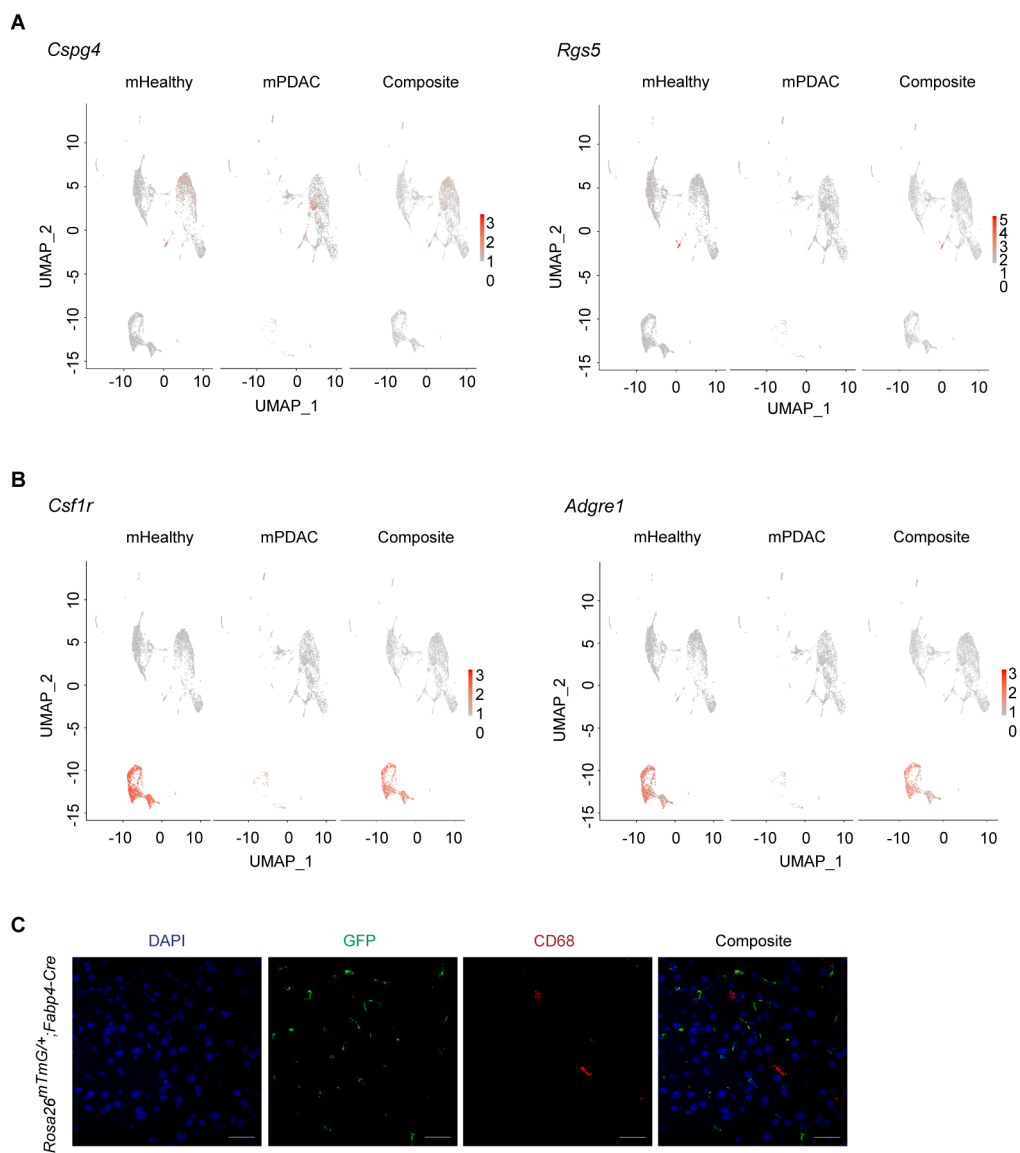

Supplementary Figure 2

A

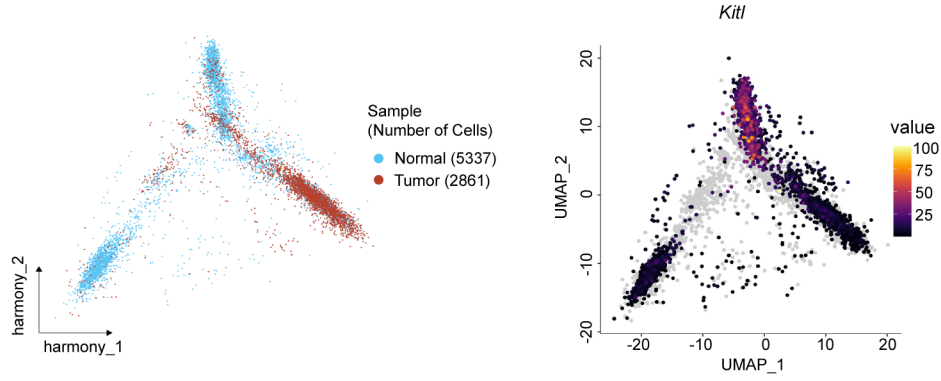

B

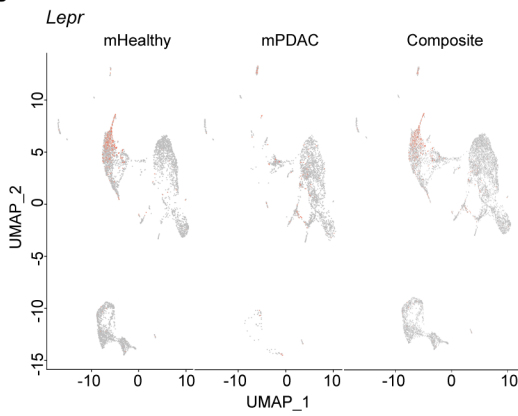

C

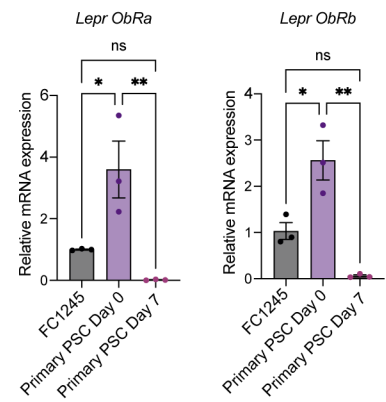

D

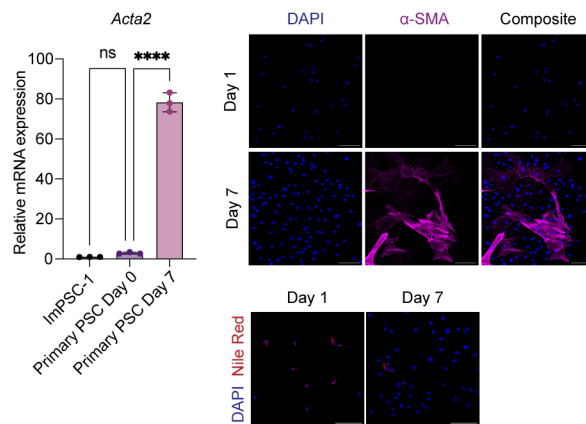

E

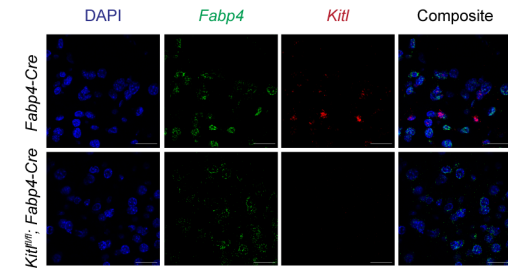

### Supplementary Figure 3

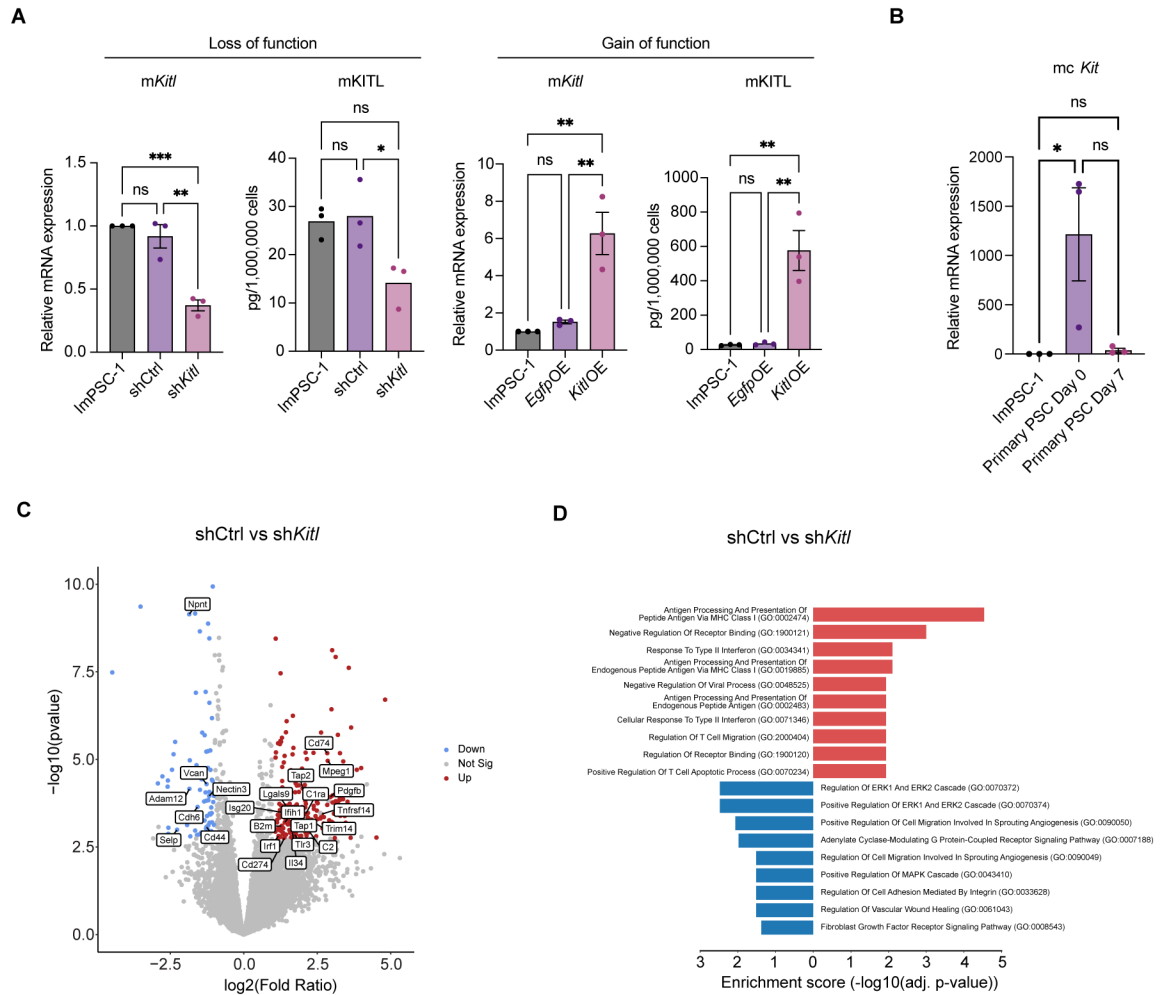

Supplementary Figure S4

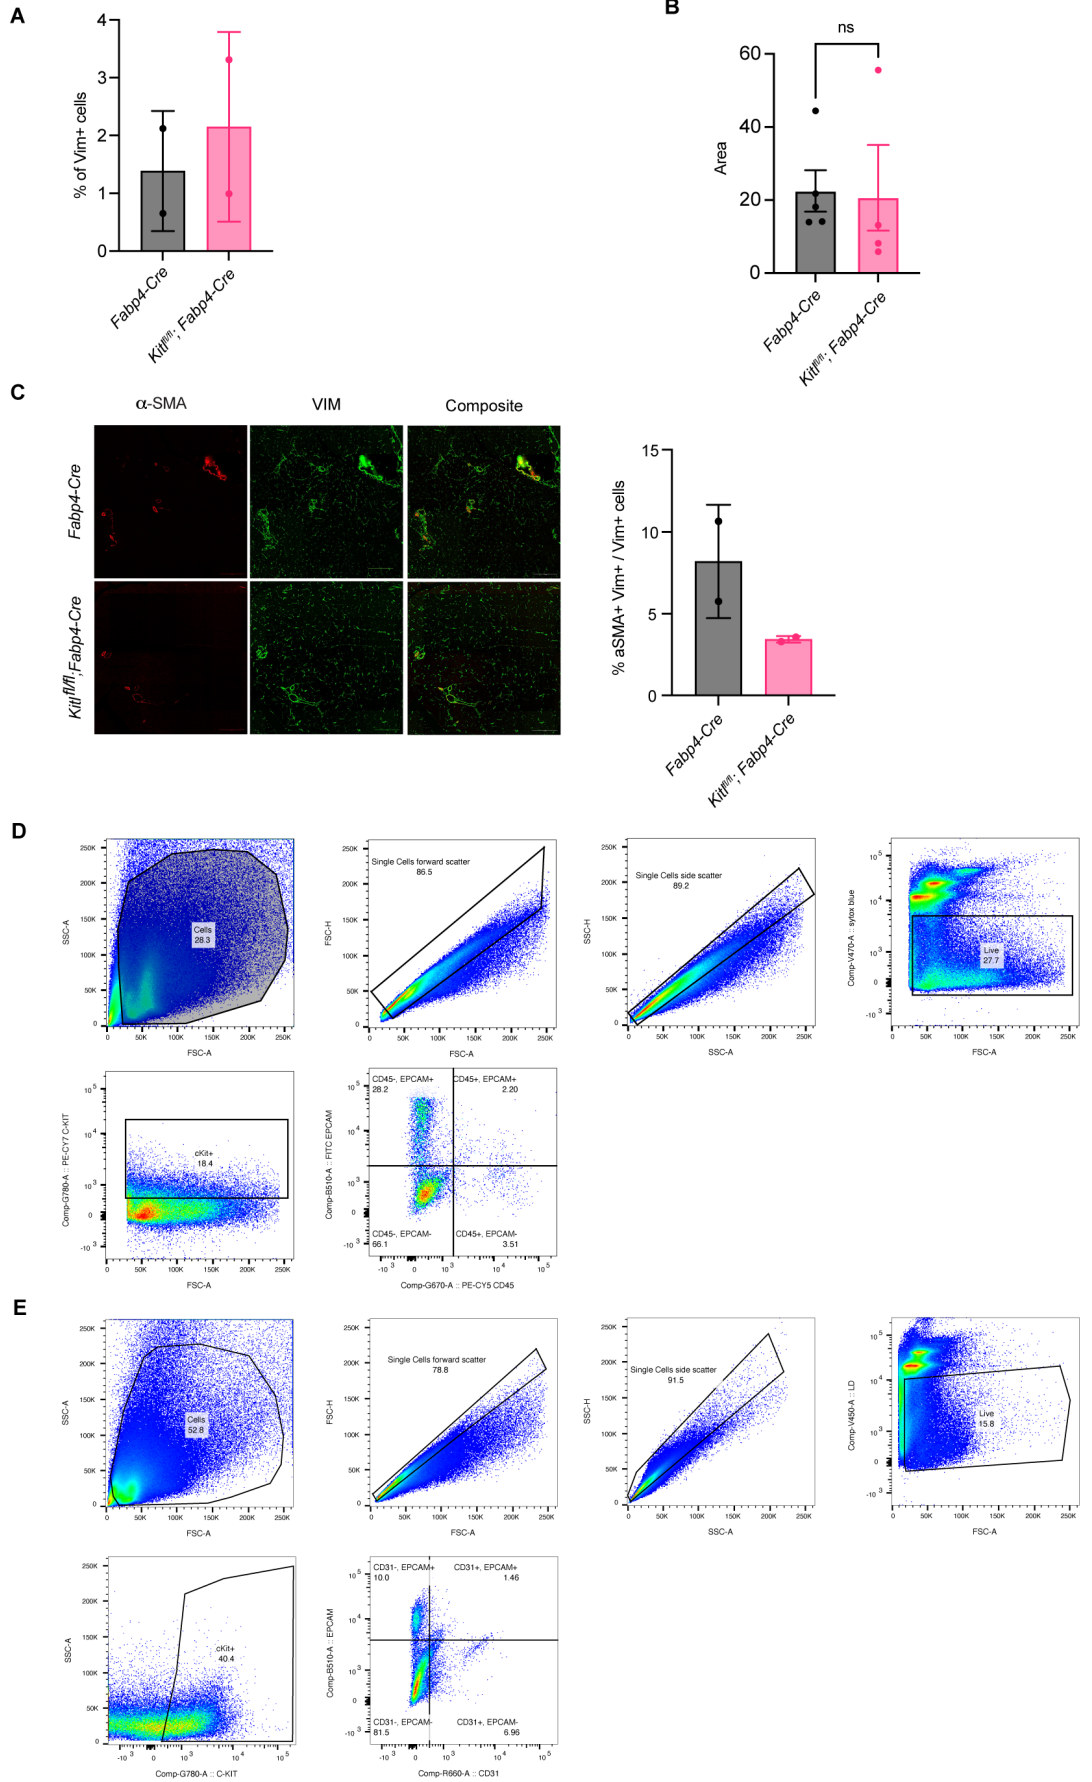

Supplement: NIHPP2024.07.29.605485v1-supplement-1.pdf [file NIHPP2024.07.29.605485v1-supplement-1.pdf]
